# Supplementary material for: The composition of metapelitic biotite, white mica, and chlorite: a review with implications for solid-solution models
Source: Copernicus journal article supplement (doi:10.5194/ejm-36-657-2024), 2024-08-30
Supplement: Supplementary file [file ejm-36-657-2024-supplement-title-page.pdf › ejm-36-657-2024-supplement-title-page.pdf]

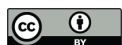

## *Supplement of*

# **The composition of metapelitic biotite, white mica, and chlorite: a review with implications for solid-solution models**

**Benoît Dubacq and Jacob B. Forshaw**

*Correspondence to:* Benoît Dubacq ([benoit.dubacq@sorbonne-universite.fr](mailto:benoit.dubacq@sorbonne-universite.fr))

- [ejm-36-657-2024-supplement-title-page.pdf](#)
- [BIOTITE-Dubacq-Forshaw\\_for\\_EJM\\_V2.ods](#)
- [CHLORITE-Dubacq-Forshaw\\_for\\_EJM\\_V2.ods](#)
- [WHITE\\_MICA-Dubacq-Forshaw\\_for\\_EJM\\_V2.ods](#)

The copyright of individual parts of the supplement might differ from the article licence.
